# Supplementary material for: Increased Oral Care Needs and Third Molar Symptoms in Women with Gestational Diabetes Mellitus: A Finnish Gestational Diabetes Case–Control Study
Source: MDPI journal article supplement (doi:10.3390/ijerph191710711), 2022-08-28
Supplement: s1 [file s1]

**Supplement Table S2.** The logistic regression analyses of oral health outcomes with (presented in main document) and without missing variables according to women's gestational diabetes mellitus (GDM) status.

| Model 1                               |              |         |      |             |                |        |      |             |                |        |      |             |                |        |      |             |                | Model 2 |  |  |  | Model 3 |  |  |  |
|---------------------------------------|--------------|---------|------|-------------|----------------|--------|------|-------------|----------------|--------|------|-------------|----------------|--------|------|-------------|----------------|---------|--|--|--|---------|--|--|--|
|                                       |              |         |      |             |                |        |      |             |                |        |      |             |                |        |      |             |                |         |  |  |  |         |  |  |  |
|                                       |              |         |      |             |                |        |      |             |                |        |      |             |                |        |      |             |                |         |  |  |  |         |  |  |  |
| GDM-Control                           |              | Total N | OR   | (95% CI)    | n <sup>a</sup> | (%)    | aOR  | (95% CI)    | n <sup>a</sup> | (%)    | aOR  | (95% CI)    | n <sup>a</sup> | (%)    | aOR  | (95% CI)    | n <sup>a</sup> | (%)     |  |  |  |         |  |  |  |
| Need for oral care                    | <sup>b</sup> | 1859    | 1.38 | (1.12-1.69) | 1844           | (99.2) | 1.53 | (1.24-1.90) | 1844           | (99.2) | 1.39 | (1.10-1.74) | 1844           | (99.2) | 1.36 | (1.08-1.72) | 1844           | (99.2)  |  |  |  |         |  |  |  |
|                                       | <sup>c</sup> | 1965    | 1.39 | (1.13-1.69) | 1948           | (99.1) | 1.54 | (1.25-1.89) | 1948           | (99.1) | 1.40 | (1.12-1.75) | 1948           | (99.1) | 1.36 | (1.08-1.72) | 1844           | (93.8)  |  |  |  |         |  |  |  |
| Gingival bleeding                     | <sup>b</sup> | 1858    | 1.13 | (0.83-1.53) | 1839           | (99.0) | 1.22 | (0.89-1.67) | 1839           | (99.0) | 1.19 | (0.85-1.66) | 1839           | (99.0) | 1.16 | (0.82-1.63) | 1839           | (99.0)  |  |  |  |         |  |  |  |
|                                       | <sup>c</sup> | 1965    | 1.09 | (0.81-1.47) | 1944           | (98.9) | 1.19 | (0.87-1.61) | 1944           | (98.9) | 1.17 | (0.84-1.63) | 1943           | (98.9) | 1.16 | (0.82-1.63) | 1839           | (93.6)  |  |  |  |         |  |  |  |
| Symptoms from the third molar         | <sup>b</sup> | 1859    | 1.16 | (0.96-1.40) | 1807           | (97.2) | 1.19 | (0.98-1.45) | 1807           | (97.2) | 1.13 | (0.92-1.40) | 1807           | (97.2) | 1.09 | (0.88-1.35) | 1807           | (97.2)  |  |  |  |         |  |  |  |
|                                       | <sup>c</sup> | 1965    | 1.17 | (0.97-1.41) | 1906           | (97.0) | 1.20 | (0.99-1.46) | 1906           | (97.0) | 1.14 | (0.93-1.40) | 1905           | (96.9) | 1.09 | (0.88-1.34) | 1807           | (92.0)  |  |  |  |         |  |  |  |
| Removed third molar                   | <sup>b</sup> | 1859    | 1.29 | (1.06-1.56) | 1840           | (99.0) | 0.97 | (0.79-1.19) | 1840           | (99.0) | 0.94 | (0.75-1.17) | 1840           | (99.0) | 0.94 | (0.75-1.17) | 1840           | (99.0)  |  |  |  |         |  |  |  |
|                                       | <sup>c</sup> | 1965    | 1.27 | (1.05-1.53) | 1942           | (98.8) | 0.95 | (0.78-1.16) | 1942           | (98.8) | 0.92 | (0.74-1.14) | 1941           | (98.8) | 0.94 | (0.75-1.17) | 1840           | (93.6)  |  |  |  |         |  |  |  |
| Restored teeth                        | <sup>b</sup> | 1847    | 1.43 | (1.05-1.95) | 1715           | (92.9) | 1.21 | (0.88-1.68) | 1715           | (92.9) | 1.13 | (0.80-1.60) | 1715           | (92.9) | 1.12 | (0.79-1.59) | 1715           | (92.9)  |  |  |  |         |  |  |  |
|                                       | <sup>c</sup> | 1965    | 1.44 | (1.06-1.94) | 1821           | (92.7) | 1.21 | (0.89-1.66) | 1821           | (92.7) | 1.14 | (0.81-1.60) | 1820           | (92.6) | 1.12 | (0.79-1.59) | 1715           | (87.3)  |  |  |  |         |  |  |  |
| Pharmacologically treated GDM-Control |              |         |      |             |                |        |      |             |                |        |      |             |                |        |      |             |                |         |  |  |  |         |  |  |  |
| Need for oral care                    | <sup>b</sup> | 1078    | 1.53 | (1.08-2.16) | 1067           | (99.0) | 1.75 | (1.21-2.52) | 1067           | (99.0) | 1.60 | (1.07-2.39) | 1067           | (99.0) | 1.58 | (1.05-2.39) | 1067           | (99.0)  |  |  |  |         |  |  |  |
|                                       | <sup>c</sup> | 1131    | 1.48 | (1.06-2.07) | 1120           | (99.0) | 1.69 | (1.19-2.42) | 1120           | (99.0) | 1.53 | (1.03-2.27) | 1120           | (99.0) | 1.58 | (1.05-2.39) | 1067           | (94.3)  |  |  |  |         |  |  |  |
| Gingival bleeding                     | <sup>b</sup> | 1078    | 1.21 | (0.73-2.02) | 1070           | (99.3) | 1.42 | (0.84-2.43) | 1070           | (99.3) | 1.57 | (0.87-2.81) | 1070           | (99.3) | 1.51 | (0.83-2.74) | 1070           | (99.3)  |  |  |  |         |  |  |  |
|                                       | <sup>c</sup> | 1131    | 1.12 | (0.68-1.84) | 1123           | (99.3) | 1.33 | (0.78-2.25) | 1123           | (99.3) | 1.45 | (0.81-2.59) | 1123           | (99.3) | 1.51 | (0.83-2.74) | 1070           | (94.6)  |  |  |  |         |  |  |  |
| Symptoms from the third molar         | <sup>b</sup> | 1078    | 1.63 | (1.18-2.25) | 1044           | (96.8) | 1.69 | (1.20-2.37) | 1044           | (96.8) | 1.82 | (1.25-2.65) | 1044           | (96.8) | 1.69 | (1.15-2.48) | 1044           | (96.8)  |  |  |  |         |  |  |  |
|                                       | <sup>c</sup> | 1131    | 1.57 | (1.15-2.15) | 1093           | (96.6) | 1.61 | (1.16-2.25) | 1093           | (96.6) | 1.73 | (1.20-2.50) | 1093           | (96.6) | 1.69 | (1.15-2.48) | 1044           | (92.3)  |  |  |  |         |  |  |  |
| Removed third molar                   | <sup>b</sup> | 1078    | 1.49 | (1.05-2.12) | 1066           | (98.9) | 0.93 | (0.64-1.37) | 1066           | (98.9) | 0.88 | (0.58-1.33) | 1066           | (98.9) | 0.88 | (0.58-1.34) | 1066           | (98.9)  |  |  |  |         |  |  |  |
|                                       | <sup>c</sup> | 1131    | 1.38 | (0.99-1.93) | 1118           | (98.9) | 0.85 | (0.59-1.22) | 1118           | (98.9) | 0.81 | (0.54-1.21) | 1118           | (98.9) | 0.88 | (0.58-1.34) | 1066           | (94.3)  |  |  |  |         |  |  |  |

|                                                |              |      |      |             |      |        |      |             |      |        |      |             |      |        |      |             |      |        |
|------------------------------------------------|--------------|------|------|-------------|------|--------|------|-------------|------|--------|------|-------------|------|--------|------|-------------|------|--------|
| Restored teeth                                 | <sup>b</sup> | 1072 | 1.09 | (0.63-1.90) | 994  | (92.7) | 0.82 | (0.46-1.47) | 994  | (92.7) | 0.76 | (0.40-1.46) | 994  | (92.7) | 0.76 | (0.39-1.48) | 994  | (92.7) |
|                                                | <sup>c</sup> | 1131 | 1.14 | (0.67-1.93) | 1049 | (92.7) | 0.83 | (0.47-1.46) | 1049 | (92.7) | 0.76 | (0.40-1.42) | 1049 | (92.7) | 0.76 | (0.39-1.48) | 994  | (87.9) |
| Diet-treated GDM-Control                       |              |      |      |             |      |        |      |             |      |        |      |             |      |        |      |             |      |        |
| Need for oral care                             | <sup>b</sup> | 1649 | 1.34 | (1.08-1.67) | 1637 | (99.3) | 1.51 | (1.20-1.89) | 1637 | (99.3) | 1.39 | (1.09-1.77) | 1637 | (99.3) | 1.37 | (1.08-1.75) | 1637 | (99.3) |
|                                                | <sup>c</sup> | 1740 | 1.36 | (1.10-1.69) | 1726 | (99.2) | 1.53 | (1.23-1.91) | 1726 | (99.2) | 1.42 | (1.13-1.80) | 1725 | (99.1) | 1.37 | (1.08-1.75) | 1637 | (94.1) |
| Gingival bleeding                              | <sup>b</sup> | 1648 | 1.09 | (0.79-1.51) | 1630 | (98.9) | 1.16 | (0.83-1.62) | 1630 | (98.9) | 1.07 | (0.75-1.52) | 1630 | (98.9) | 1.04 | (0.73-1.50) | 1630 | (98.9) |
|                                                | <sup>c</sup> | 1740 | 1.06 | (0.77-1.45) | 1720 | (98.9) | 1.13 | (0.82-1.57) | 1720 | (98.9) | 1.05 | (0.74-1.49) | 1719 | (98.8) | 1.04 | (0.73-1.50) | 1630 | (93.7) |
| Symptoms from the third molar                  | <sup>b</sup> | 1649 | 1.05 | (0.86-1.29) | 1604 | (97.3) | 1.10 | (0.89-1.36) | 1604 | (97.3) | 1.04 | (0.83-1.30) | 1604 | (97.3) | 1.00 | (0.80-1.26) | 1604 | (97.3) |
|                                                | <sup>c</sup> | 1740 | 1.07 | (0.88-1.30) | 1689 | (97.1) | 1.12 | (0.91-1.37) | 1689 | (97.1) | 1.06 | (0.85-1.31) | 1688 | (97.0) | 1.00 | (0.80-1.25) | 1604 | (92.2) |
| Removed third molar                            | <sup>b</sup> | 1649 | 1.24 | (1.01-1.52) | 1633 | (99.0) | 0.97 | (0.78-1.21) | 1633 | (99.0) | 0.94 | (0.74-1.18) | 1633 | (99.0) | 0.93 | (0.74-1.18) | 1633 | (99.0) |
|                                                | <sup>c</sup> | 1740 | 1.25 | (1.02-1.52) | 1720 | (98.9) | 0.97 | (0.78-1.19) | 1720 | (98.9) | 0.92 | (0.73-1.16) | 1719 | (98.8) | 0.93 | (0.74-1.18) | 1633 | (93.9) |
| Restored teeth                                 | <sup>b</sup> | 1638 | 1.55 | (1.12-2.14) | 1519 | (92.7) | 1.34 | (0.96-1.87) | 1519 | (92.7) | 1.24 | (0.87-1.78) | 1519 | (92.7) | 1.23 | (0.86-1.76) | 1519 | (92.7) |
|                                                | <sup>c</sup> | 1740 | 1.53 | (1.12-2.10) | 1611 | (92.6) | 1.32 | (0.95-1.83) | 1611 | (92.6) | 1.24 | (0.88-1.76) | 1610 | (92.5) | 1.23 | (0.86-1.75) | 1519 | (87.3) |
| Pharmacologically treated GDM-Diet-treated GDM |              |      |      |             |      |        |      |             |      |        |      |             |      |        |      |             |      |        |
| Need for oral care                             | <sup>b</sup> | 939  | 1.14 | (0.80-1.61) | 932  | (99.3) | 1.17 | (0.82-1.66) | 932  | (99.3) | 1.07 | (0.75-1.54) | 932  | (99.3) | 1.07 | (0.74-1.53) | 932  | (99.3) |
|                                                | <sup>c</sup> | 1001 | 1.08 | (0.77-1.52) | 992  | (99.1) | 1.10 | (0.78-1.55) | 992  | (99.1) | 1.02 | (0.72-1.44) | 991  | (99.0) | 1.07 | (0.74-1.53) | 932  | (93.1) |
| Gingival bleeding                              | <sup>b</sup> | 938  | 1.12 | (0.67-1.86) | 928  | (98.9) | 1.21 | (0.72-2.03) | 928  | (98.9) | 1.19 | (0.70-2.01) | 928  | (98.9) | 1.13 | (0.66-1.92) | 928  | (98.9) |
|                                                | <sup>c</sup> | 1001 | 1.05 | (0.63-1.75) | 989  | (98.8) | 1.14 | (0.68-1.91) | 989  | (98.8) | 1.13 | (0.67-1.90) | 988  | (98.7) | 1.13 | (0.66-1.92) | 928  | (92.7) |
| Symptoms from the third molar                  | <sup>b</sup> | 939  | 1.55 | (1.11-2.14) | 920  | (98.0) | 1.59 | (1.14-2.22) | 920  | (98.0) | 1.52 | (1.09-2.13) | 920  | (98.0) | 1.50 | (1.07-2.11) | 920  | (98.0) |
|                                                | <sup>c</sup> | 1001 | 1.47 | (1.07-2.02) | 978  | (97.7) | 1.53 | (1.10-2.11) | 978  | (97.7) | 1.46 | (1.05-2.02) | 977  | (97.6) | 1.50 | (1.07-2.11) | 920  | (91.9) |
| Removed third molar                            | <sup>b</sup> | 939  | 1.20 | (0.84-1.72) | 929  | (98.9) | 0.98 | (0.67-1.42) | 929  | (98.9) | 0.96 | (0.66-1.41) | 929  | (98.9) | 0.96 | (0.66-1.41) | 929  | (98.9) |
|                                                | <sup>c</sup> | 1001 | 1.11 | (0.79-1.56) | 988  | (98.7) | 0.90 | (0.63-1.28) | 988  | (98.7) | 0.88 | (0.62-1.27) | 987  | (98.6) | 0.96 | (0.66-1.41) | 929  | (92.8) |
| Restored teeth                                 | <sup>b</sup> | 932  | 0.71 | (0.41-1.22) | 873  | (93.7) | 0.62 | (0.35-1.08) | 873  | (93.7) | 0.59 | (0.33-1.03) | 873  | (93.7) | 0.59 | (0.33-1.03) | 873  | (93.7) |
|                                                | <sup>c</sup> | 1001 | 0.74 | (0.44-1.25) | 936  | (93.5) | 0.63 | (0.37-1.07) | 936  | (93.5) | 0.59 | (0.34-1.01) | 935  | (93.4) | 0.59 | (0.33-1.03) | 873  | (87.2) |

| Recurrent GDM-Control         |              |      |      |             |      |        |      |             |      |        |      |             |      |        |      |             |      |        |
|-------------------------------|--------------|------|------|-------------|------|--------|------|-------------|------|--------|------|-------------|------|--------|------|-------------|------|--------|
| Need for oral care            | <sup>b</sup> | 1108 | 1.77 | (1.29-2.44) | 1097 | (99.0) | 1.91 | (1.35-2.69) | 1097 | (99.0) | 1.85 | (1.27-2.70) | 1097 | (99.0) | 1.85 | (1.26-2.71) | 1097 | (99.0) |
|                               | <sup>c</sup> | 1168 | 1.90 | (1.40-2.58) | 1156 | (99.0) | 2.07 | (1.49-2.88) | 1156 | (99.0) | 2.00 | (1.39-2.88) | 1156 | (99.0) | 1.85 | (1.26-2.71) | 1097 | (93.9) |
| Gingival bleeding             | <sup>b</sup> | 1107 | 0.87 | (0.51-1.49) | 1098 | (99.2) | 1.04 | (0.59-1.82) | 1098 | (99.2) | 0.90 | (0.49-1.67) | 1098 | (99.2) | 0.89 | (0.48-1.66) | 1098 | (99.2) |
|                               | <sup>c</sup> | 1168 | 0.83 | (0.50-1.40) | 1158 | (99.1) | 1.02 | (0.59-1.77) | 1158 | (99.1) | 0.89 | (0.49-1.63) | 1158 | (99.1) | 0.88 | (0.47-1.64) | 1099 | (94.1) |
| Symptoms from the third molar | <sup>b</sup> | 1108 | 1.26 | (0.93-1.71) | 1073 | (96.8) | 1.31 | (0.95-1.82) | 1073 | (96.8) | 1.32 | (0.92-1.89) | 1073 | (96.8) | 1.25 | (0.87-1.80) | 1073 | (96.8) |
|                               | <sup>c</sup> | 1168 | 1.25 | (0.93-1.68) | 1128 | (96.6) | 1.28 | (0.93-1.75) | 1128 | (96.6) | 1.28 | (0.91-1.82) | 1128 | (96.6) | 1.25 | (0.87-1.80) | 1073 | (91.9) |
| Removed third molar           | <sup>b</sup> | 1108 | 1.70 | (1.22-2.39) | 1096 | (98.9) | 1.14 | (0.79-1.64) | 1096 | (98.9) | 1.09 | (0.73-1.62) | 1096 | (98.9) | 1.11 | (0.74-1.66) | 1096 | (98.9) |
|                               | <sup>c</sup> | 1168 | 1.68 | (1.21-2.32) | 1155 | (98.9) | 1.09 | (0.77-1.56) | 1155 | (98.9) | 1.06 | (0.72-1.55) | 1155 | (98.9) | 1.11 | (0.74-1.66) | 1096 | (93.8) |
| Restored teeth                | <sup>b</sup> | 1101 | 2.07 | (1.33-3.22) | 1014 | (92.1) | 1.63 | (1.01-2.64) | 1014 | (92.1) | 1.61 | (0.95-2.74) | 1014 | (92.1) | 1.58 | (0.92-2.69) | 1014 | (92.1) |
|                               | <sup>c</sup> | 1168 | 2.00 | (1.30-3.08) | 1073 | (91.9) | 1.54 | (0.96-2.46) | 1073 | (91.9) | 1.48 | (0.88-2.50) | 1073 | (91.9) | 1.58 | (0.92-2.69) | 1014 | (86.8) |
| First GDM-Control             |              |      |      |             |      |        |      |             |      |        |      |             |      |        |      |             |      |        |
| Need for oral care            | <sup>b</sup> | 1645 | 1.28 | (1.03-1.59) | 1633 | (99.3) | 1.45 | (1.16-1.83) | 1633 | (99.3) | 1.33 | (1.04-1.69) | 1633 | (99.3) | 1.30 | (1.02-1.67) | 1633 | (99.3) |
|                               | <sup>c</sup> | 1732 | 1.26 | (1.01-1.55) | 1719 | (99.2) | 1.43 | (1.15-1.79) | 1719 | (99.2) | 1.31 | (1.04-1.67) | 1718 | (99.2) | 1.30 | (1.02-1.67) | 1633 | (94.3) |
| Gingival bleeding             | <sup>b</sup> | 1645 | 1.21 | (0.88-1.66) | 1627 | (98.9) | 1.30 | (0.94-1.81) | 1627 | (98.9) | 1.31 | (0.92-1.86) | 1627 | (98.9) | 1.28 | (0.90-1.82) | 1627 | (98.9) |
|                               | <sup>c</sup> | 1732 | 1.17 | (0.86-1.60) | 1713 | (98.9) | 1.26 | (0.92-1.74) | 1713 | (98.9) | 1.29 | (0.91-1.81) | 1712 | (98.8) | 1.28 | (0.89-1.82) | 1627 | (93.9) |
| Symptoms from the third molar | <sup>b</sup> | 1645 | 1.13 | (0.92-1.38) | 1598 | (97.1) | 1.14 | (0.93-1.41) | 1598 | (97.1) | 1.10 | (0.88-1.38) | 1598 | (97.1) | 1.06 | (0.84-1.33) | 1598 | (97.1) |
|                               | <sup>c</sup> | 1732 | 1.15 | (0.94-1.39) | 1680 | (97.0) | 1.16 | (0.95-1.43) | 1680 | (97.0) | 1.12 | (0.90-1.39) | 1679 | (96.9) | 1.06 | (0.85-1.33) | 1598 | (92.3) |
| Removed third molar           | <sup>b</sup> | 1645 | 1.19 | (0.97-1.47) | 1629 | (99.0) | 0.92 | (0.74-1.15) | 1629 | (99.0) | 0.90 | (0.71-1.14) | 1629 | (99.0) | 0.90 | (0.71-1.14) | 1629 | (99.0) |
|                               | <sup>c</sup> | 1732 | 1.18 | (0.97-1.44) | 1712 | (98.8) | 0.91 | (0.73-1.12) | 1712 | (98.8) | 0.88 | (0.70-1.10) | 1711 | (98.8) | 0.9  | (0.71-1.14) | 1629 | (94.1) |
| Restored teeth                | <sup>b</sup> | 1635 | 1.26 | (0.90-1.77) | 1521 | (93.0) | 1.11 | (0.78-1.57) | 1521 | (93.0) | 1.03 | (0.71-1.50) | 1521 | (93.0) | 1.02 | (0.70-1.48) | 1521 | (93.0) |
|                               | <sup>c</sup> | 1732 | 1.29 | (0.93-1.78) | 1610 | (93.0) | 1.14 | (0.81-1.59) | 1610 | (93.0) | 1.08 | (0.75-1.54) | 1609 | (92.9) | 1.02 | (0.70-1.48) | 1521 | (87.8) |
| Recurrent GDM-First GDM       |              |      |      |             |      |        |      |             |      |        |      |             |      |        |      |             |      |        |
| Need for oral care            | <sup>b</sup> | 965  | 1.39 | (1.00-1.91) | 958  | (99.3) | 1.37 | (0.97-1.92) | 958  | (99.3) | 1.30 | (0.92-1.83) | 958  | (99.3) | 1.31 | (0.93-1.86) | 958  | (99.3) |

|                               |              |             |      |             |      |        |      |             |      |        |      |             |      |        |      |             |     |        |
|-------------------------------|--------------|-------------|------|-------------|------|--------|------|-------------|------|--------|------|-------------|------|--------|------|-------------|-----|--------|
|                               | <sup>c</sup> | <b>1030</b> | 1.52 | (1.11-2.06) | 1021 | (99.1) | 1.48 | (1.07-2.06) | 1021 | (99.1) | 1.41 | (1.01-1.97) | 1020 | (99.0) | 1.31 | (0.93-1.86) | 958 | (93.0) |
| Gingival bleeding             | <sup>b</sup> | <b>964</b>  | 0.73 | (0.43-1.24) | 953  | (98.9) | 0.81 | (0.46-1.43) | 953  | (98.9) | 0.80 | (0.45-1.41) | 953  | (98.9) | 0.80 | (0.45-1.41) | 953 | (98.9) |
|                               | <sup>c</sup> | <b>1030</b> | 0.71 | (0.42-1.19) | 1017 | (98.7) | 0.81 | (0.47-1.41) | 1017 | (98.7) | 0.81 | (0.47-1.41) | 1016 | (98.6) | 0.79 | (0.45-1.41) | 953 | (92.5) |
| Symptoms from the third molar | <sup>b</sup> | <b>965</b>  | 1.12 | (0.82-1.52) | 943  | (97.7) | 1.17 | (0.84-1.62) | 943  | (97.7) | 1.12 | (0.80-1.57) | 943  | (97.7) | 1.15 | (0.82-1.62) | 943 | (97.7) |
|                               | <sup>c</sup> | <b>1030</b> | 1.09 | (0.81-1.47) | 1004 | (97.5) | 1.15 | (0.83-1.58) | 1004 | (97.5) | 1.11 | (0.80-1.53) | 1003 | (97.4) | 1.14 | (0.82-1.60) | 943 | (91.6) |
| Removed third molar           | <sup>b</sup> | <b>965</b>  | 1.43 | (1.01-2.02) | 955  | (99.0) | 1.19 | (0.82-1.74) | 955  | (99.0) | 1.19 | (0.81-1.74) | 955  | (99.0) | 1.21 | (0.83-1.78) | 955 | (99.0) |
|                               | <sup>c</sup> | <b>1030</b> | 1.42 | (1.02-1.98) | 1017 | (98.7) | 1.18 | (0.82-1.69) | 1017 | (98.7) | 1.18 | (0.82-1.70) | 1016 | (98.6) | 1.21 | (0.83-1.78) | 955 | (92.7) |
| Restored teeth                | <sup>b</sup> | <b>958</b>  | 1.64 | (1.05-2.55) | 895  | (93.4) | 1.47 | (0.91-2.36) | 895  | (93.4) | 1.43 | (0.89-2.31) | 895  | (93.4) | 1.47 | (0.91-2.37) | 895 | (93.4) |
|                               | <sup>c</sup> | <b>1030</b> | 1.55 | (1.01-2.38) | 959  | (93.1) | 1.29 | (0.82-2.04) | 959  | (93.1) | 1.26 | (0.80-2.00) | 958  | (93.0) | 1.47 | (0.91-2.37) | 895 | (86.9) |

Model 1 included maternal age and parity, Model 2 included Model 1 + pre-pregnancy BMI and Model 3 included Model 2 + smoking during pregnancy, education and history of asthma and insomnia and/or mental disorders. Chronic hypertension, gestational hypertension and pre-eclampsia were included in Model 3 when gingival bleeding was analyzed. Hyperemesis was included in Model 3 when analyzing the number of restored teeth.

<sup>a</sup> n included to the model

<sup>b</sup> No missing variables in analyses

<sup>c</sup> Missing variables included in analyses

GDM, gestational diabetes mellitus; OR, odds ratio; aOR, adjusted odds ratio; CI, confidence interval
