# Supplementary material for: Increased Oral Care Needs and Third Molar Symptoms in Women with Gestational Diabetes Mellitus: A Finnish Gestational Diabetes Case–Control Study
Source: MDPI journal article supplement (doi:10.3390/ijerph191710711), 2022-08-28
Supplement: s1 [file s1]

**Supplement Table S1.** Associations between oral health and maternal background characteristics.

|                                             |                          | Removed<br>third molar<br>(yes/no) | Number of<br>removed<br>third molars | Third molar<br>symptoms | Gingival<br>bleeding | Restored<br>teeth (> 10) | Maternal age | Parity      | Pre-pregnancy<br>BMI |
|---------------------------------------------|--------------------------|------------------------------------|--------------------------------------|-------------------------|----------------------|--------------------------|--------------|-------------|----------------------|
| <b>Need for oral<br/>care</b>               | OR                       | 0.83                               | 0.93                                 | 1.14                    | 2.04                 | 1.88                     | 0.98         | 1.03        | 1.05                 |
|                                             | 95% CI                   | (0.68–1.03)                        | (0.88–0.99)                          | (0.93–1.40)             | (1.72–2.42)          | (1.65–2.15)              | (0.96–1.00)  | (1.01–1.05) | (1.00–1.10)          |
|                                             | P value                  | 0.085                              | 0.025                                | 0.206                   | < 0.001              | < 0.001                  | 0.027        | < 0.001     | 0.038                |
|                                             | Missing,<br><i>n</i> (%) | 38 (1.9%)                          | 38 (1.9%)                            | 73 (3.7%)               | 35 (1.8%)            | 153 (7.8%)               | 17 (0.9%)    | 18 (0.9%)   | 17 (0.9%)            |
| <b>Removed<br/>third molar<br/>(yes/no)</b> | OR                       |                                    |                                      | 6.42                    | 1.12                 | 1.46                     | 1.13         | 1.02        | 1.12                 |
|                                             | 95% CI                   |                                    |                                      | (5.02–8.21)             | (0.95–1.32)          | (1.30–1.66)              | (1.10–1.15)  | (1.00–1.04) | (1.06–1.19)          |
|                                             | P value                  |                                    |                                      | < 0.001                 | 0.168                | < 0.001                  | < 0.001      | 0.039       | < 0.001              |
|                                             | Missing<br><i>n</i> (%)  |                                    |                                      | 76 (3.9)                | 42 (2.1)             | 165 (8.4)                | 23 (1.2)     | 24 (1.2)    | 23 (1.2)             |
| <b>Third molar<br/>symptoms</b>             | OR                       | 6.42                               | 1.48                                 |                         | 1.11                 | 1.00                     | 0.99         | 1.01        | 1.00                 |
|                                             | 95% CI                   | (5.02–8.21)                        | (1.39–1.57)                          |                         | (0.95–1.30)          | (0.89–1.12)              | (0.98–1.01)  | (1.00–1.03) | (0.95–1.04)          |
|                                             | P value                  | < 0.001                            | < 0.001                              |                         | 0.181                | 0.954                    | 0.451        | 0.082       | 0.832                |
|                                             | Missing<br><i>n</i> (%)  | 76 (3.9)                           | 76 (3.9)                             |                         | 78 (4.0)             | 193 (9.8)                | 59 (3.0)     | 60(3.1)     | 59 (3.0)             |
| <b>Gingival<br/>bleeding</b>                | OR                       | 1.12                               | 0.96                                 | 1.11                    |                      | 1.62                     | 0.95         | 1.01        | 0.93                 |
|                                             | 95% CI                   | (0.95–1.32)                        | (0.82–1.11)                          | (0.95–1.30)             |                      | (1.18–2.22)              | (0.90–0.99)  | (0.97–1.06) | (0.81–1.08)          |
|                                             | P value                  | 0.168                              | 0.562                                | 0.181                   |                      | 0.003                    | 0.017        | 0.566       | 0.367                |
|                                             | Missing<br><i>n</i> (%)  | 42 (2.1)                           | 42 (2.1)                             | 78 (4.0)                |                      | 159 (8.1)                | 21 (1.1)     | 22 (1.1)    | 21 (1.1)             |
| <b>Restored<br/>teeth</b>                   | OR                       | 1.46                               | 1.32                                 | 1.00                    | 1.62                 |                          | 1.07         | 1.03        | 1.09                 |
|                                             | 95% CI                   | (1.30–1.66)                        | (1.20–1.45)                          | (0.89–1.12)             | (1.18–2.22)          |                          | (1.04–1.10)  | (1.00–1.05) | (1.02–1.16)          |
|                                             | P value                  | < 0.001                            | < 0.001                              | 0.954                   | 0.003                |                          | < 0.001      | 0.035       | 0.010                |
|                                             | <i>n</i> (%)             |                                    |                                      |                         |                      |                          |              |             |                      |

|                                     | Missing              | 165 (8.4)        | 165 (8.4)              | 193 (9.8)         | 159 (8.1)                                   |                      | 144 (7.3)                                 | 145 (7.4) | 144 (7.3)   |
|-------------------------------------|----------------------|------------------|------------------------|-------------------|---------------------------------------------|----------------------|-------------------------------------------|-----------|-------------|
|                                     |                      | Maternal smoking | Educational attainment | History of asthma | History of insomnia and/or mental disorders | Chronic hypertension | Gestational hypertension or Pre-eclampsia |           | Hyperemesis |
| <b>Need for oral care</b>           | OR                   | 1.42             | 0.84                   | 1.24              | 1.57                                        |                      |                                           |           |             |
|                                     | 95% CI               | (1.10–1.85)      | (0.75–0.94)            | (0.90–1.72)       | (1.18–2.09)                                 |                      |                                           |           |             |
|                                     | P value              | 0.008            | 0.003                  | 0.194             | 0.002                                       |                      |                                           |           |             |
|                                     | Missing <i>n</i> (%) | 17 (0.9)         | 17 (0.9)               | 100 (5.1)         | 98 (5.0)                                    |                      |                                           |           |             |
| <b>Removed third molar (yes/no)</b> | OR                   | 0.81             | 1.31                   | 1.18              | 1.28                                        |                      |                                           |           |             |
|                                     | 95% CI               | (0.63–1.04)      | (1.31–1.46)            | (0.85–1.63)       | (0.95–1.72)                                 |                      |                                           |           |             |
|                                     | P value              | 0.091            | < 0.001                | 0.329             | 0.102                                       |                      |                                           |           |             |
|                                     | Missing <i>n</i> (%) | 23 (1.2)         | 23 (1.2)               | 103 (5.2)         | 103 (5.2)                                   |                      |                                           |           |             |
| <b>Third molar symptoms</b>         | OR                   | 1.66             | 0.81                   | 1.45              | 1.51                                        |                      |                                           |           |             |
|                                     | 95% CI               | (1.29–2.13)      | (0.73–0.90)            | (1.07–1.97)       | (1.15–1.98)                                 |                      |                                           |           |             |
|                                     | P value              | < 0.001          | < 0.001                | 0.017             | 0.003                                       |                      |                                           |           |             |
|                                     | Missing <i>n</i> (%) | 59 (3.0)         | 59 (3.0)               | 137 (7.0)         | 136 (6.9)                                   |                      |                                           |           |             |
| <b>Gingival bleeding</b>            | OR                   | 1.55             | 0.60                   | 0.92              | 2.08                                        | 1.24                 | 1.20                                      |           |             |
|                                     | 95% CI               | (0.86–2.78)      | (0.44–0.81)            | (0.39–2.16)       | (1.15–3.75)                                 | (0.60–2.53)          | (0.68–2.09)                               |           |             |
|                                     | P value              | 0.144            | < 0.001                | 0.845             | 0.016                                       | 0.562                | 0.533                                     |           |             |
|                                     | Missing <i>n</i> (%) | 21 (1.1)         | 21 (1.1)               | 103 (5.2)         | 102 (5.2)                                   | 22 (1.1)             | 22 (1.1)                                  |           |             |
| <b>Restored teeth</b>               | OR                   | 1.12             | 1.05                   | 1.30              | 1.03                                        |                      |                                           |           | 1.00        |
|                                     | 95% CI               | (0.75–1.68)      | (0.89–1.23)            | (0.82–2.06)       | (0.66–1.61)                                 |                      |                                           |           | (0.95–1.06) |
|                                     | P value              | 0.576            | 0.595                  | 0.264             | 0.893                                       |                      |                                           |           | 0.997       |
|                                     | Missing <i>n</i> (%) | 144 (7.3)        | 144 (7.3)              | 219 (11.1)        | 217 (11.0)                                  |                      |                                           |           | 157 (8.0)   |

BMI, body mass index; OR, odds ratio; CI, confidence interval.

Missing values in number (percentage).

The chi-square test was the chosen analytical method. "Cannot say" answers were removed from the analyses.
